# Supplementary material for: Dissociating Autoantibody Responses against Ro52 Antigen in Patients with Anti-Synthetase or Anti-MDA5 Antibodies
Source: MDPI journal article supplement (doi:10.3390/diagnostics13243621), 2023-12-08
Supplement: s1 [file s1]

**(A)**

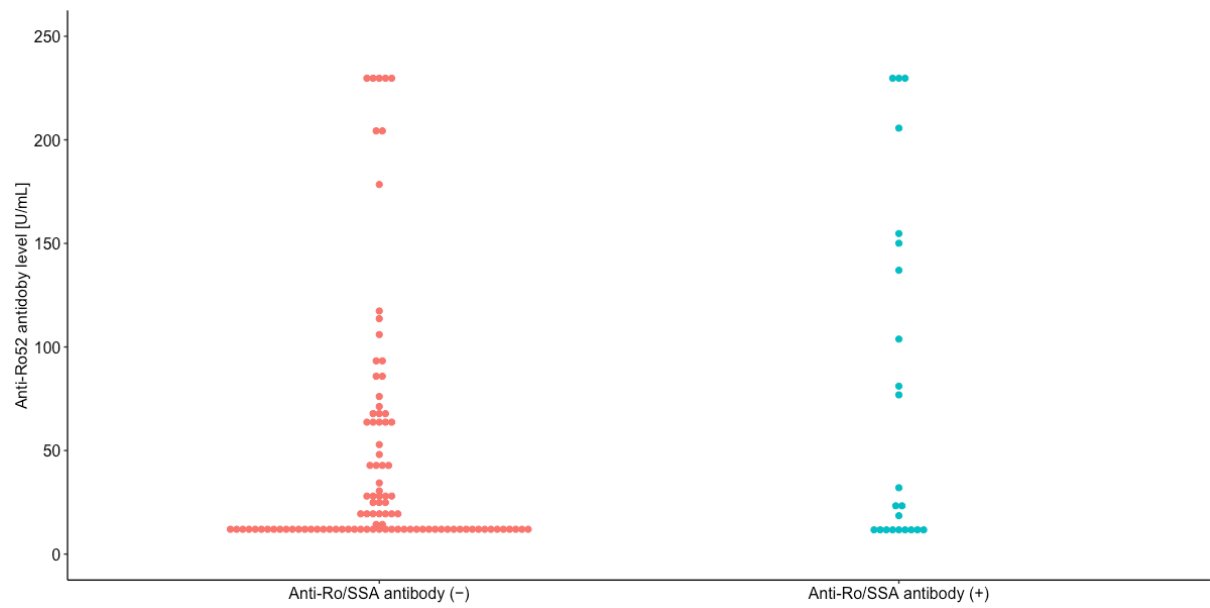

**(B)**

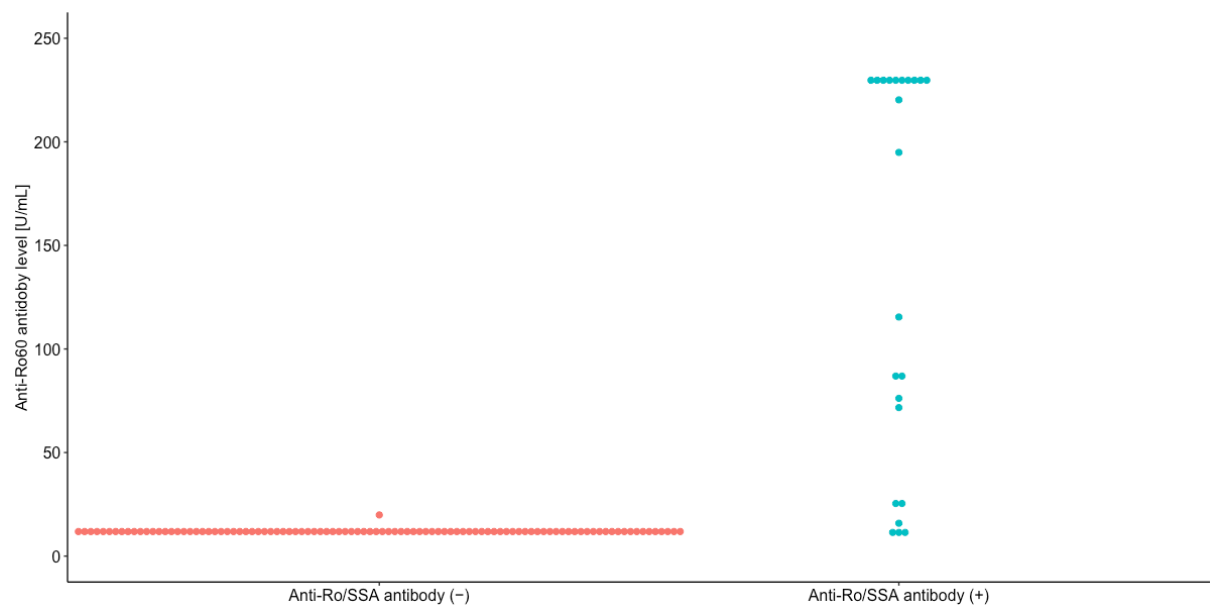

**Supplementary Figure S1. (A)** Anti-Ro52 antibody levels and **(B)** Anti-Ro60 antibody levels stratified by anti-Ro/SSA antibody-positivity by RNA-IP in patients with anti-synthetase antibodies.

(A)

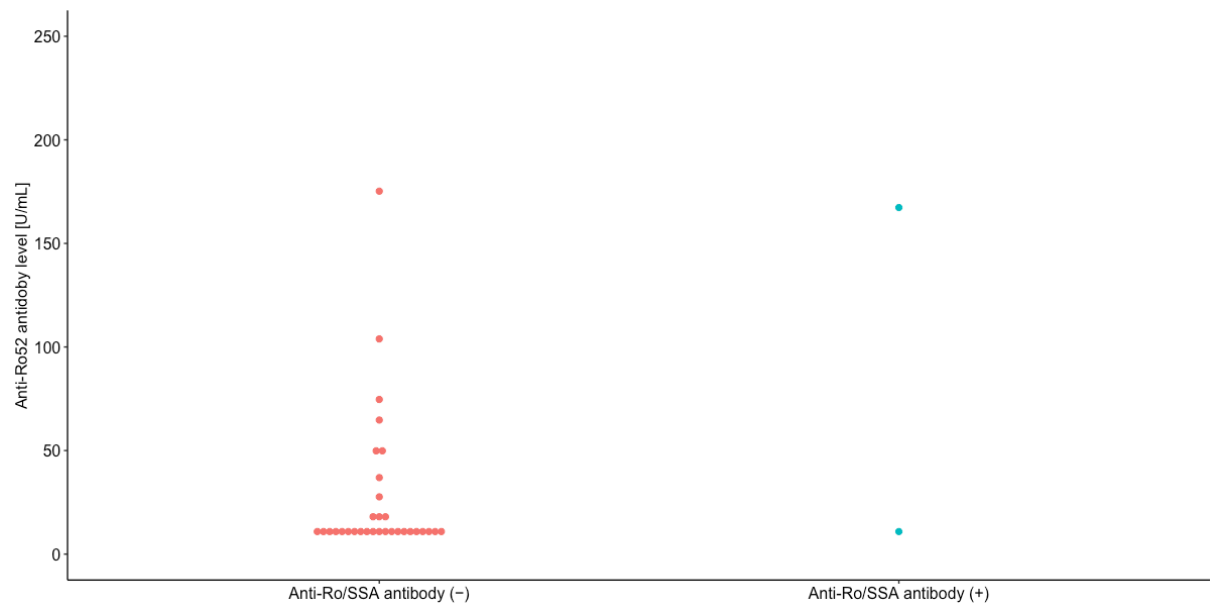

**(B)**

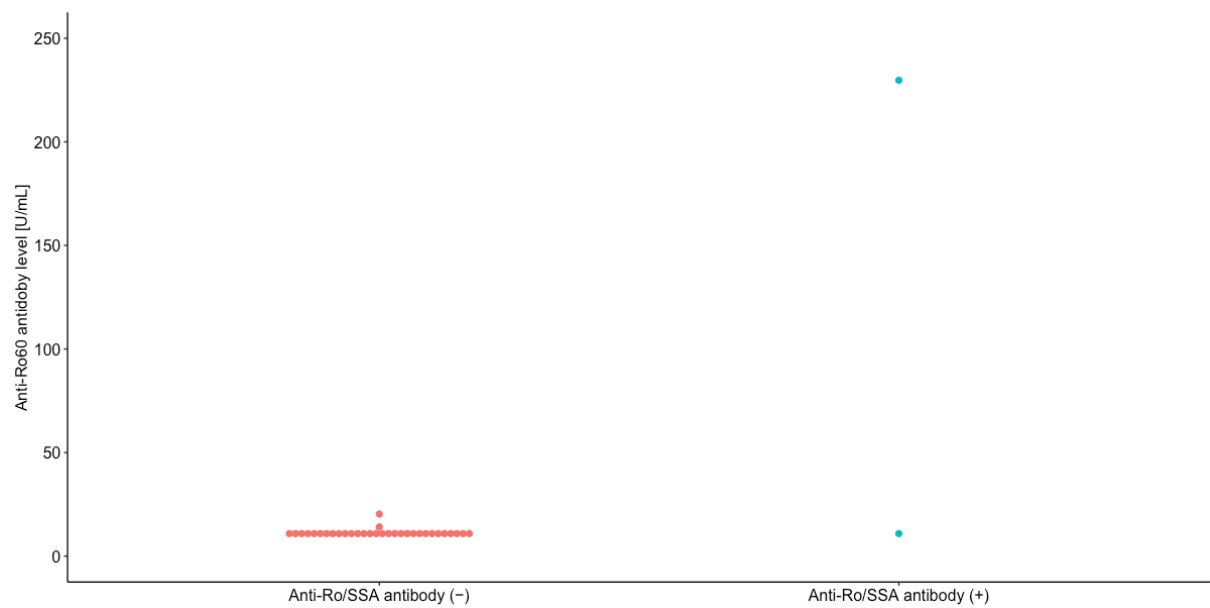

**Supplementary Figure S2. (A)** Anti-Ro52 antibody levels and **(B)** Anti-Ro60 antibody levels stratified by anti-Ro/SSA antibody-positivity by RNA-IP in patients with anti-MDA5 antibodies.

**Supplementary Table S1.** Previous studies reporting the prevalence and clinical significance of anti-Ro52 antibodies in patients with anti-synthetase antibodies

| Study                                | Country               | Study type    | Sample size | Anti-Ro52 antibody testing method | Prevalence of anti-Ro52 antibodies | Clinical association                                                                          |
|--------------------------------------|-----------------------|---------------|-------------|-----------------------------------|------------------------------------|-----------------------------------------------------------------------------------------------|
| Brouwer <i>et al.</i> [36]           | 11 European countries | Retrospective | 85          | EIA                               | 65.9%                              | Not reported                                                                                  |
| Dugar <i>et al.</i> [37]             | Australia             | Retrospective | 42          | EIA                               | 35.7%                              | No association                                                                                |
| Marie <i>et al.</i> [14]             | France                | Retrospective | 89          | EIA                               | 40.4%                              | Symptomatic ILD<br>Malignancy, poor OS                                                        |
| Yamasaki <i>et al.</i> [38]          | Japan                 | Retrospective | 97          | EIA                               | 59.0%                              | Overlap syndrome                                                                              |
| Bauhammer <i>et al.</i> [15]         | Germany               | Retrospective | 61          | LIA                               | 42.9%                              | Acute ILD<br>Non-response to IS drugs                                                         |
| Shi <i>et al.</i> [16]               | China                 | Retrospective | 124         | LIA                               | 29.0%                              | RP-ILD                                                                                        |
| Pinal-Fernandez <i>et al.</i> [17]   | USA                   | Retrospective | 169         | LIA                               | 65.7%                              | Arthritis, mechanic's hands,<br>DM-specific rash<br>No association with malignancy or poor OS |
| Sreevilasan <i>et al.</i> [39]       | India                 | Retrospective | 28          | LIA                               | 50.0%                              | No association with ILD                                                                       |
| Bozzalla-Cassione <i>et al.</i> [18] | Italy                 | Retrospective | 60          | LIA                               | 56.7%                              | ILD, myositis<br>No association with poor OS                                                  |

|                            |          |               |     |     |       |                                       |
|----------------------------|----------|---------------|-----|-----|-------|---------------------------------------|
| Gui <i>et al.</i> [13]     | China    | Retrospective | 173 | LIA | 53.2% | No association with RP-ILD or poor OS |
| Martins <i>et al.</i> [40] | Portugal | Retrospective | 70  | LIA | 21.4% | No association                        |
| Sodsri <i>et al.</i> [41]  | Thailand | Retrospective | 82  | LIA | 45.1% | ILD, poor OS                          |

DM, dermatomyositis; EIA, enzyme immunoassay; ILD, interstitial lung disease; IS, immunosuppressive; LIA, line immunoassay; NA, not available; OS, overall survival; RP-ILD, rapidly progressive interstitial lung disease.

**Supplementary Table S2.** Previous studies reporting the prevalence and clinical significance of anti-Ro52 antibodies in patients with anti-MDA5 antibodies

| Study                      | Country | Study type    | Sample size | Anti-Ro52 antibody testing method | Prevalence of anti-Ro52 antibodies | Clinical association                 |
|----------------------------|---------|---------------|-------------|-----------------------------------|------------------------------------|--------------------------------------|
| Huang <i>et al.</i> [19]   | Canada  | Retrospective | 21          | LIA                               | 61.9%                              | RP-ILD<br>Skin ulceration            |
| Xu <i>et al.</i> [20]      | China   | Retrospective | 83          | LIA                               | 74.7%                              | RP-ILD<br>Skin ulceration<br>Poor OS |
| Cavagna <i>et al.</i> [21] | Italy   | Retrospective | 149         | LIA                               | 31.5%                              | RP-ILD                               |
| Gui <i>et al.</i> [13]     | China   | Retrospective | 173         | LIA                               | 53.2%                              | RP-ILD<br>Poor OS                    |
| You <i>et al.</i> [22]     | China   | Retrospective | 272         | LIA                               | 64.0%                              | RP-ILD                               |
| Wang <i>et al.</i> [23]    | China   | Retrospective | 126         | LIA                               | 60.3%                              | Poor OS                              |
| Liu <i>et al.</i> [24]     | China   | Retrospective | 200         | LIA                               | 63.3%                              | Poor OS                              |

LIA, line immunoassay; OS, overall survival; RP-ILD, rapidly progressive interstitial lung disease.
